# Supplementary material for: Skin optical properties in the obese and their relation to body mass index: a review
Source: PubMed Central journal article supplement (PMC8963797; doi:10.1117/1.jbo.27.3.030902), 2022-03-29
Supplement: JBO_027_030902_SD001.pdf [file JBO_027_030902_SD001.pdf]

| Parameter                                           | Anatomical Region and Tissue Type (reference)                                                 | Instrument/ Method                                                                        | Population Size  | Value at Lowest BMI | Value at Highest BMI                                           | Relative % Change                                          |
|-----------------------------------------------------|-----------------------------------------------------------------------------------------------|-------------------------------------------------------------------------------------------|------------------|---------------------|----------------------------------------------------------------|------------------------------------------------------------|
| Strand Thickness                                    | Abdominal keratinocytes (Horie, 2018)                                                         | Ki-67 immunostaining and microscopy                                                       | n = 50, females  | 4.7                 | 11.9                                                           | 153.20%                                                    |
|                                                     | Forearm epidermal cell size (Altintas, 2016)                                                  | Reflectance-mode confocal microscopy (RCM)                                                | n = 20           | 772.6               | 821.3                                                          | 6.30%                                                      |
|                                                     | Forearm epidermal thickness (Altintas, 2016)                                                  | Reflectance-mode confocal microscopy (RCM)                                                | n = 20           | 44                  | 54.8                                                           | 24.50%                                                     |
|                                                     | Abdominal epidermal area (Horie, 2018)                                                        | Hematoxylin/eosin staining, and microscopy                                                | n = 50, females  | 0.045               | 0.06                                                           | 33.30%                                                     |
|                                                     | Face surface roughness (Mori, 2017)                                                           | Polarized images VisioScan VC98                                                           | n = 93           | 1.08                | 1.83                                                           | 69.40%                                                     |
|                                                     | Forearm stratum corneum moisture (de Farias Pires, 2016)                                      | Corneometer CM820                                                                         | n = 492, males   | 23.7                | 13.65                                                          | -73.60%                                                    |
|                                                     | Abdominal Epidermal Hydration –inverted U (Monteiro Rodrigues, 2017)                          | MoistureMeter SC                                                                          | n = 847, females | 33.25               | 23.7                                                           | -38.60%                                                    |
|                                                     | Breast (Monteiro Rodrigues, 2017)                                                             |                                                                                           |                  | 45.7                | 69.7                                                           | 52.50%                                                     |
|                                                     | Forehead (Monteiro Rodrigues, 2017)                                                           |                                                                                           |                  | 49.9                | 46.1                                                           | -7.60%                                                     |
|                                                     | Zygomatic area (Monteiro Rodrigues, 2017)                                                     |                                                                                           |                  | 48.5                | 44.9                                                           | -7.40%                                                     |
| Lipid                                               | Abdominal Cholesterol (Horie, 2018)                                                           | Cholesterol E-Test, NEFA C-Test                                                           | n = 50, females  | 2.4                 | 1.4                                                            | -41.70%                                                    |
|                                                     | Abdominal Fatty acids (Horie, 2018)                                                           |                                                                                           |                  | 3.8                 | 1.95                                                           | -48.70%                                                    |
|                                                     | Abdomen –dermal thickness (Matsumoto, 2014)                                                   | DermaScan Ultra                                                                           | n = 90, males    | 1.53                | 1.72                                                           | 12.42%                                                     |
|                                                     | Thigh –dermal thickness (Matsumoto, 2014)                                                     |                                                                                           |                  | 1.39                | 1.65                                                           | 18.71%                                                     |
|                                                     | Upper arm –dermal thickness (Matsumoto, 2014)                                                 |                                                                                           |                  | 1.51                | 1.8                                                            | 19.21%                                                     |
|                                                     | Abdominal and thigh dermal thickness (Derraik, 2014)                                          | Phillips IU-22 ultrasound machine                                                         | n = 140          | 1.7                 | 2.3                                                            | 35%                                                        |
|                                                     | Rear upper arm epidermis & dermis (Gibney, 2010)                                              | Cortex DermaScanC                                                                         | n = 388          | 2.1                 | 2.4                                                            | 14.30%                                                     |
|                                                     | Anterior upper thigh epidermis & dermis (Gibney, 2010)                                        |                                                                                           |                  | 1.7                 | 2                                                              | 17.60%                                                     |
|                                                     | Anterior abdominal epidermis & dermis (Gibney, 2010)                                          |                                                                                           |                  | 2.1                 | 2.2                                                            | 4.80%                                                      |
|                                                     | Outer buttocks epidermis & dermis (Gibney, 2010)                                              |                                                                                           |                  | 2.3                 | 2.7                                                            | 17.40%                                                     |
| Strand Thickness                                    | Dorsal foot (heel) skin thickness [mm] [skin & subcutaneous tissues] (Jacopi, 2020)           | Logiq 7pro ultrasound system                                                              | n = 120          | 1.11                | 1.4                                                            | 26%                                                        |
|                                                     | Dorsal foot (under scaphoid) Skin thickness [mm] [skin & subcutaneous tissues] (Jacopi, 2020) |                                                                                           |                  | 0.57                | 0.65                                                           | 14%                                                        |
|                                                     | Upper back (shoulders) dermal thickness (Smalls, 2006)                                        | DermaScanC ultrasound                                                                     | n = 22           | nr                  | nr                                                             | r = -0.46                                                  |
|                                                     | Abdomen (Monteiro Rodrigues, 2017)                                                            | Tewameter TM300                                                                           | n = 89           | 6.4                 | 7.9                                                            | 23.44%                                                     |
|                                                     | Breast (Monteiro Rodrigues, 2017)                                                             |                                                                                           |                  | 7.3                 | 15.8                                                           | 116.44%                                                    |
|                                                     | Forehead (Monteiro Rodrigues, 2017)                                                           |                                                                                           |                  | 9.6                 | 15.3                                                           | 59.38%                                                     |
|                                                     | Zygomatic area (Monteiro Rodrigues, 2017)                                                     |                                                                                           |                  | 11.7                | 16.3                                                           | 39.32%                                                     |
|                                                     | Face (right cheek) (Mori, 2017)                                                               | Tewameter MPA500                                                                          | n = 93           | 17.6                | 19.4                                                           | 10.23%                                                     |
|                                                     | Forearm (Guisa, 2010)                                                                         | VapoMeter SLO3 Defini                                                                     | n = 80           | 18.5                | 10.8                                                           | -41.62%                                                    |
|                                                     | Forearm (Loffler, 2002)                                                                       | Tewameter TM210                                                                           | n = 63           | 6.9                 | 11.5                                                           | 66.67%                                                     |
| TEWL                                                | Forearm collagen content (Black, 1971)                                                        | 5 mm punch biopsies                                                                       | n = 16           | nr                  | nr                                                             | no change in content, thus density must decrease           |
|                                                     | Abdominal collagen bundle thickness (Light, 2010)                                             | Histological staining and light microscopy                                                | n = 10           | nr                  | nr                                                             | decreased thickness –degraded and disorganized matrix      |
|                                                     | Back collagen bundle thickness (Light, 2010)                                                  |                                                                                           |                  | nr                  | nr                                                             |                                                            |
|                                                     | Papillary dermis collagen fiber thickness [µm] (Sami, 2015)                                   | Hematoxylin Eosin, and Mallory staining and Image Analyzer System (Leica Q500 MC program) | n = 30           | 1.78                | 2.19                                                           | 23%                                                        |
|                                                     | Reticular dermis collagen fiber thickness [µm] (Sami, 2015)                                   |                                                                                           |                  | 9.32                | 9.03                                                           | -3.10%                                                     |
|                                                     | Abdominal (epigastrum) collagen concentration (Drphee, 2010)                                  | Image Analyzer System (Kontron Electronic 300, Zeiss, Germany)                            | n = 80           | 58.6                | 46.4                                                           | -20.80%                                                    |
|                                                     | Abdominal (hypogastrum) collagen concentration (Drphee, 2010)                                 |                                                                                           |                  | 52.4                | 47.6                                                           | -10%                                                       |
|                                                     | Upper arm –upper dermis collagen density (Matsumoto, 2014)                                    | DermaScanC ultrasound                                                                     | n = 80, males    | 12                  | 11.2                                                           | -6.70%                                                     |
|                                                     | Upper arm –lower dermis collagen density (Matsumoto, 2014)                                    |                                                                                           |                  | 6.4                 | 5.2                                                            | -18.80%                                                    |
|                                                     | Abdomen –upper dermis collagen density (Matsumoto, 2014)                                      |                                                                                           |                  | 11.7                | 9.8                                                            | -16.20%                                                    |
| Collagen                                            | Abdomen –lower dermis collagen density (Matsumoto, 2014)                                      |                                                                                           |                  | 7.7                 | 5.4                                                            | -29.90%                                                    |
|                                                     | Thigh –upper dermis collagen density (Matsumoto, 2014)                                        |                                                                                           |                  | 18.3                | 16.4                                                           | -10.40%                                                    |
|                                                     | Thigh –lower dermis collagen density (Matsumoto, 2014)                                        |                                                                                           |                  | 12.1                | 8.6                                                            | -28.90%                                                    |
|                                                     | Thigh collagen density (Ibuki, 2018)                                                          | DermaScanC ultrasound                                                                     | n = 69, males    | nr                  | nr                                                             | low collagen density associated with high oxidative stress |
|                                                     | Papillary dermis collagen density [µm] (Sami, 2015)                                           | Hematoxylin Eosin, and Mallory staining and Image Analyzer System (Leica Q500 MC program) | n = 30           | 53.47               | 56.41                                                          | 5.30%                                                      |
|                                                     | Reticular dermis collagen density [µm] (Sami, 2015)                                           |                                                                                           |                  | 67.12               | 68.72                                                          | 2.40%                                                      |
|                                                     | Abdominal fat cell size (Jansson, 1992)                                                       | Sectioned, sliced and treated with collagenase                                            | n = 16           | 83                  | 107                                                            | 28.90%                                                     |
|                                                     | Femoral fat cell size (Jansson, 1992)                                                         | Immunohistochemistry                                                                      | n = 17           | 94                  | 108                                                            | 14.90%                                                     |
|                                                     | Subcutaneous adipose tissue adipocyte cell size [µm <sup>2</sup> ] (Gealekman, 2011)          |                                                                                           |                  | 1427                | 1818                                                           | 27.40%                                                     |
|                                                     | Abdominal and thigh subcutis thickness [mm] (Derraik, 2014)                                   | Phillips IU-22 ultrasound machine                                                         | n = 140          | 8.8                 | 28.8                                                           | 227%                                                       |
| Size and Thickness                                  | Rear upper arm SAT (Gibney, 2010)                                                             | GE LOGIQe ultrasound                                                                      | n = 388          | 7.7                 | 13.5                                                           | 75.30%                                                     |
|                                                     | Anterior upper thigh SAT (Gibney, 2010)                                                       |                                                                                           |                  | 7.8                 | 12.6                                                           | 61.50%                                                     |
|                                                     | Anterior abdomen SAT (Gibney, 2010)                                                           |                                                                                           |                  | 9.5                 | 17.3                                                           | 82.10%                                                     |
|                                                     | Outer buttocks SAT (Gibney, 2010)                                                             |                                                                                           |                  | 13.7                | 16.6                                                           | 21.20%                                                     |
|                                                     | Forearm lipid concentration (Taroni, 2003)                                                    | Time-resolved reflectance and transmittance spectroscopy                                  | n = 2            | 64                  | 86                                                             | 34.30%                                                     |
|                                                     | Breast lipid content (Spinelli, 2004)                                                         | Multiwavelength time-resolved optical mammography                                         | n = 113          | 54.4                | 66.1                                                           | 21.50%                                                     |
|                                                     | Abdominal subcutaneous fat [kg] (Jansson, 2002)                                               | Magnetic resonance imaging                                                                | n = 173, males   | 2.08                | 4.26                                                           | 104.80%                                                    |
|                                                     | Forearm water concentration (Taroni, 2003)                                                    | Time-resolved reflectance and transmittance spectroscopy                                  | n = 101, females | 2.66                | 4.25                                                           | 59.80%                                                     |
|                                                     | Breast water content (Spinelli, 2004)                                                         | Multiwavelength time-resolved optical mammography                                         | n = 113          | 18.9                | 2.4                                                            | -87.30%                                                    |
|                                                     | Abdomen (Laaksonen, 2003)                                                                     | Dielectric constant                                                                       | n = 27           | 27.8                | 23.3                                                           | -16.20%                                                    |
| Lipid                                               | Collagen V (Spencer, 2011)                                                                    | RT-PCR and immunohistochemistry (IHC)                                                     | n = 17           | 10.9                | 18                                                             | 65.10%                                                     |
|                                                     | Eumelanin –abdominal visceral adipose tissue measured as PTCA in ng/µl (Randhawa, 2009)       | LC-UV-MS, immunohistochemical staining, and L-(U-14C) Tyrosine assay                      | n = 10           | 0.05                | 0.19                                                           | 280%                                                       |
|                                                     | Subcutaneous connective tissue from lower dermis – fluorescence (Gietzi, 1992)                | LS48 Perkin-Elmer spectrofluorometer                                                      | n = 26           | nr                  | nr                                                             | No significant correlation with BMI                        |
|                                                     | Carotid artery vessel thickness [mm] (Vinet, 2010)                                            | High-resolution vascular ultrasonography                                                  | n = 16           | 0.5                 | 0.62                                                           | 24%                                                        |
|                                                     | Forearm (volar) capillary density (Altintas, 2016)                                            | Confocal microscopy gallium-arsenide laser                                                | n = 20           | 6.02                | 4.91                                                           | -18.40%                                                    |
|                                                     | Finger, dorsum, capillary density (Caerlichow, 2010)                                          | Capillaroscopy –video microscopy                                                          | n = 250          | 91.8                | 88.6                                                           | -3.50%                                                     |
|                                                     | Finger, dorsum capillary density (Debbabi, 2006)                                              | Intravital video-microscopy                                                               | n = 170          | OW/NHT: 68.2 ± 11.5 | OW/NHT: untreated 59.6                                         | -12%                                                       |
|                                                     | SAT & visceral tissue capillary density (Gealekman, 2011)                                     | Immunohistochemistry & microscopy (lumens/mm <sup>2</sup> )                               | n = 17           | OW/OB: 94.27        | MOB: 43.3                                                      | -54%                                                       |
|                                                     | Finger, dorsum, capillary density at rest (Francischetti, 2011)                               | Video microscopy                                                                          | n = 125          | 135.2               | 132.3                                                          | -2.10%                                                     |
|                                                     | Finger, dorsum, capillary recruitment (Francischetti, 2011)                                   |                                                                                           |                  | 8.7                 | 1.8                                                            | -79.30%                                                    |
| Capillary                                           | Nailfold capillary recruitment (De Jongh, 2004)                                               | Capillaroscopy                                                                            | n = 28           | 37.4                | 56.2                                                           | 33.50%                                                     |
|                                                     | Finger, dorsum, capillary recruitment (Caerlichow, 2010)                                      | Capillaroscopy –video microscopy                                                          | n = 250          | 5.4                 | 9.5                                                            | 75.93%                                                     |
|                                                     | Finger Nailfold cutaneous blood flow (Chin, 1999)                                             | Laser doppler flowmetry and capillaroscopy                                                | n = 34, children | 71.8                | 123.4                                                          | 123.40%                                                    |
|                                                     | Face (right cheek) cutaneous blood flow (Mori, 2017)                                          | Laser speckle blood flow system, PeriCam PSI NR                                           | n = 93, females  | 117.8               | 147.5                                                          | 25.20%                                                     |
|                                                     | Forearm (volar) dermal blood cell blood flow (Altintas, 2016)                                 | Confocal microscopy gallium-arsenide laser                                                | n = 20           | 51.1                | 63.1                                                           | 23.50%                                                     |
|                                                     | Forearm blood flow (Loffler, 2002)                                                            | Laser Doppler (PF 5010, Perimed)                                                          | n = 62           | 5.6                 | 7.7                                                            | 37.50%                                                     |
|                                                     | Brachial artery peak blood flow (Vinet, 2010)                                                 | Ultrasonography with Doppler                                                              | n = 16           | 398                 | 229                                                            | -73.80%                                                    |
|                                                     | Leg blood flow (Vinet, 2010)                                                                  |                                                                                           |                  | 36.9                | 21.5                                                           | -41.60%                                                    |
|                                                     | Abdomen, gluteal region, front of the thigh fatty blood flow (Larsen, 1996)                   | Xe-clearance                                                                              | n = 69           | nr                  | nr                                                             | -39.50%                                                    |
|                                                     | Abdominal ATBF (Jansson, 1992)                                                                | Xe-clearance                                                                              | n = 16           | 3.2                 | 1.6                                                            | -50%                                                       |
| Blood flow                                          | Femoral ATBF (Jansson, 1992)                                                                  | Xe-clearance                                                                              | n = 27           | 2.7                 | 2.4                                                            | -11.10%                                                    |
|                                                     | Abdominal subcutaneous ATBF (Bolinder, 2000)                                                  | Xe-clearance                                                                              | n = 26           | 1.895               | 1.158                                                          | -39%                                                       |
|                                                     | Abdominal subcutaneous ATBF (Jansson, 1998)                                                   | Xe-clearance                                                                              | n = 24           | 3.4                 | 1.7                                                            | -50%                                                       |
|                                                     | Abdominal SAT (Jansson, 1998)                                                                 | Xe-clearance                                                                              | n = 31           | 08.2.4              | 08(20):1.7                                                     | -29.20%                                                    |
|                                                     | Abdominal wall (Mitsuo, 2010)                                                                 | Xe-clearance                                                                              | n = 37           | 1319                | 648                                                            | -50.90%                                                    |
|                                                     | Forearm (Monteiro Rodrigues, 2017)                                                            | Venous occlusion Plethysmography                                                          | n = 10           | 14.6                | 10.7                                                           | -24.40%                                                    |
|                                                     | Forearm total hemoglobin concentration [µM] (Taroni, 2003)                                    | Time-resolved reflectance and transmittance spectroscopy                                  | n = 2            | 169                 | 32                                                             | -81%                                                       |
|                                                     | Breast total hemoglobin [µM] (Spinelli, 2004)                                                 | Multiwavelength time-resolved optical mammography                                         | n = 113          | 17.4                | 11.4                                                           | -34.50%                                                    |
|                                                     | Face (right cheek) [cell/mm <sup>3</sup> ] (Mori, 2017)                                       | NIRS-based tissue-blood oxygenation monitor, 80M-LTRSF                                    | n = 93, females  | 7.3                 | 7.33                                                           | -4.30%                                                     |
|                                                     | Circulatory hemoglobin [mg/dL] –inverted u-shaped (Ghadiri-Kean, 2014)                        | Fasting blood samples                                                                     | n = 406          | 13.2                | 13.5                                                           | 2.3% non.sig. increase                                     |
| Hemoglobin                                          | Blood hemoglobin concentration [g/dL] (Hung, 2019)                                            | Blood test - Hb positive correlation in pre- and post-bariatric surgery                   | n = 221          | 13.2                | 14.2                                                           | 7.60%                                                      |
|                                                     | Circulatory hemoglobin (Aster, 2017)                                                          | Cyanmethemoglobin Method                                                                  | n = 200          | nr                  | nr                                                             | significantly increased                                    |
|                                                     | Glycosylated hemoglobin (A1c, or HbA1c) (Das, 2014)                                           | Boronate affinity method                                                                  | n = 120          | nr                  | nr                                                             | positive correlation with BMI                              |
| Glycosylated hemoglobin (A1c, or HbA1c) (Das, 2016) | Boronate affinity method                                                                      | n = 180                                                                                   | nr               | nr                  | positive correlation with BMI, increasing r with obesity group |                                                            |
